# Supplementary material for: Characterization of the Skin Microbiota in Italian Stream Frogs (Rana italica) Infected and Uninfected by a Cutaneous Parasitic Disease
Source: PubMed Central journal article supplement (PMC4567565; doi:10.1264/jsme2.me15041), 2015-09-15

Fig. S1. Heatmap showing the relative abundances of the OTUs across specimens uninfected (R151S, R155S, R156S) and infected (R150M, R152M, R154M) by *Amphibiocystidium* and clusters based on Bray-Curtis distances. OTU abundance cut-offs were set to a minimum ranging from 5 to 600 reads). Darker orange indicates higher values of abundance.

Fig. S2. nMDS plot based on Bray-Curtis distances among cutaneous bacterial communities, considered as OTUs, of specimens uninfected (R151S, R155S, R156S) and infected (R150M, R152M, R154M) by *Amphibiocystidium*.

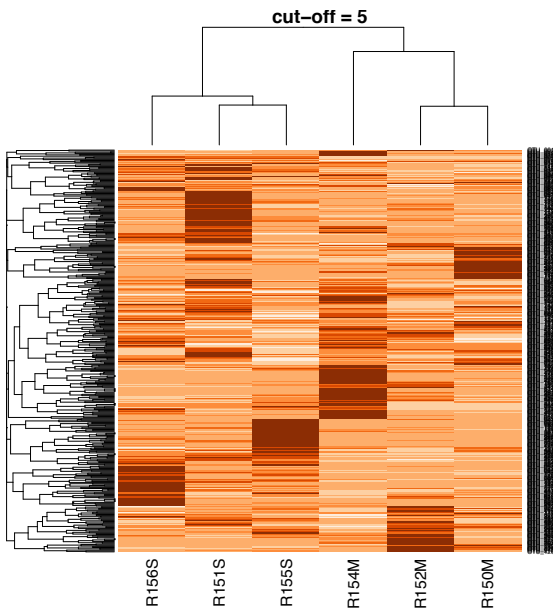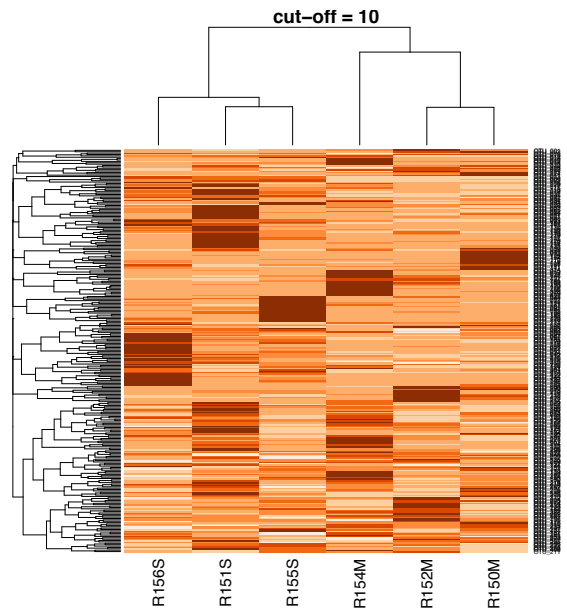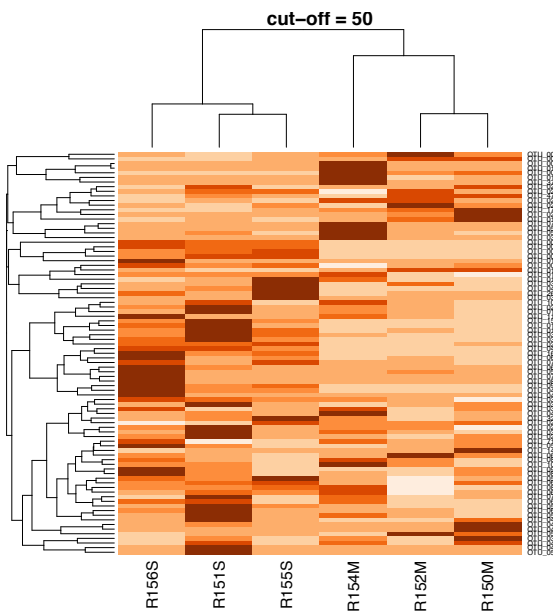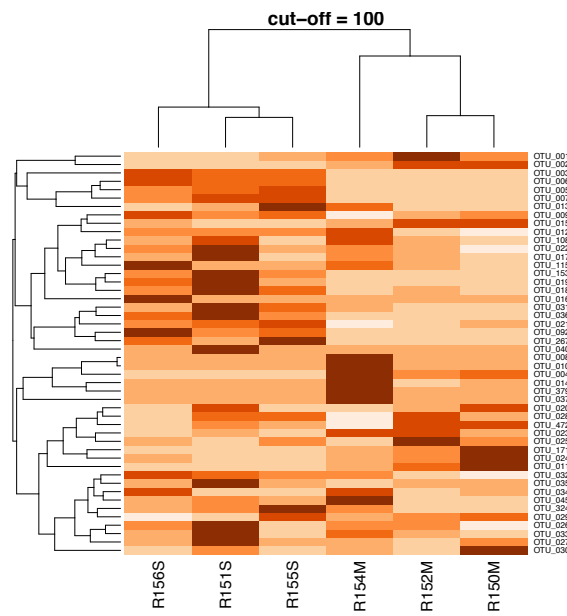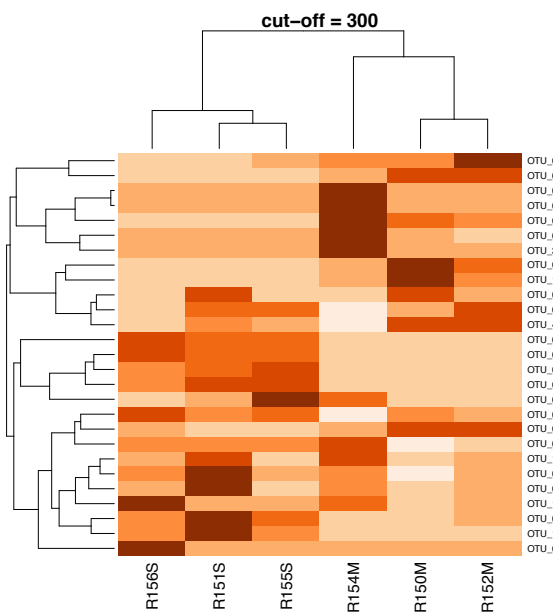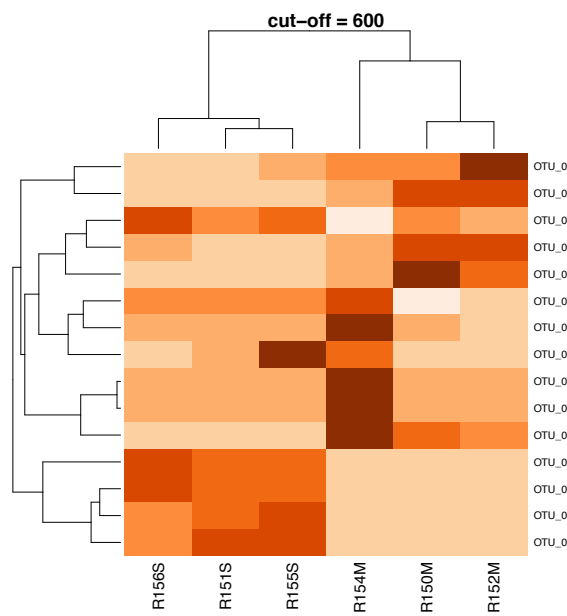

Stress = 0.062

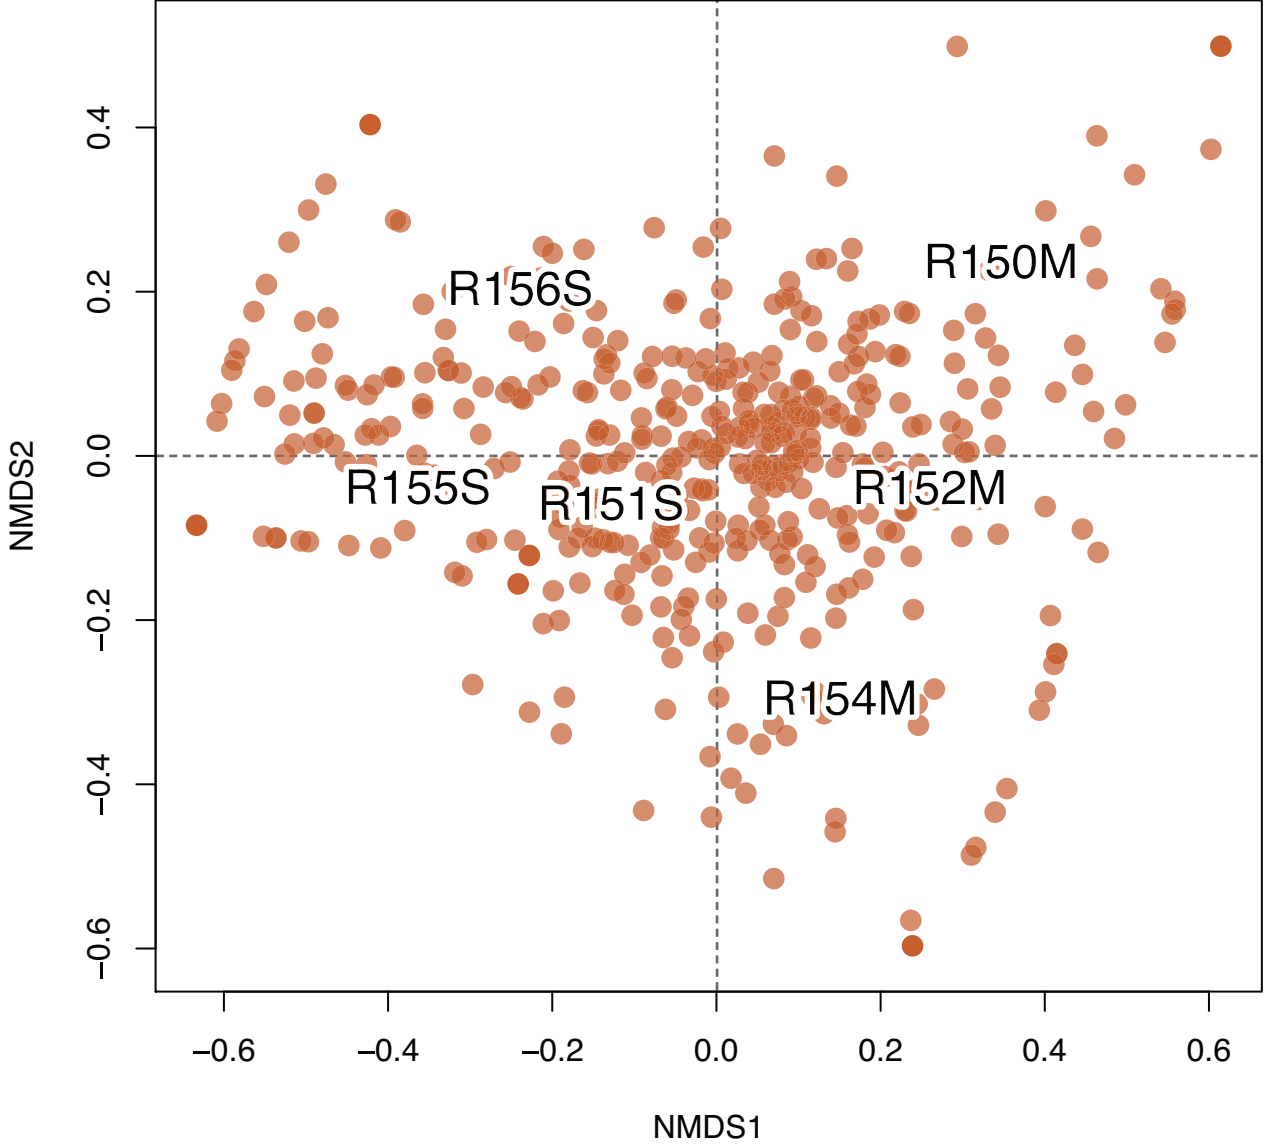

Supplement: 30_262_s1.pdf [file 30_262_s1.pdf]
